# Supplementary material for: Fe/Mg-Modified Carbonate Apatite with Uniform Particle Size and Unique Transport Protein-Related Protein Corona Efficiently Delivers Doxorubicin into Breast Cancer Cells
Source: PubMed Central journal article supplement (PMC7712760; doi:10.3390/nano10050834), 2020-04-27
Supplement: nanomaterials-10-00834-s001.pdf [file nanomaterials-10-00834-s001.pdf]

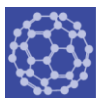

# Fe/Mg-Modified Carbonate Apatite with Uniform Particle Size and Unique Transport Protein-Related Protein Corona Efficiently Delivers Doxorubicin into Breast Cancer Cells

Sheikh Tanzina Haque <sup>1</sup>, Md. Emranul Karim <sup>1</sup>, Syafiq Asnawi Zainal Abidin <sup>1</sup>, Iekhsan Othman <sup>1</sup>, Mark M. Banaszak Holl <sup>2</sup> and Ezharul Hoque Chowdhury <sup>1,2,3,\*</sup>

Supplemental Materials:

## A. CA

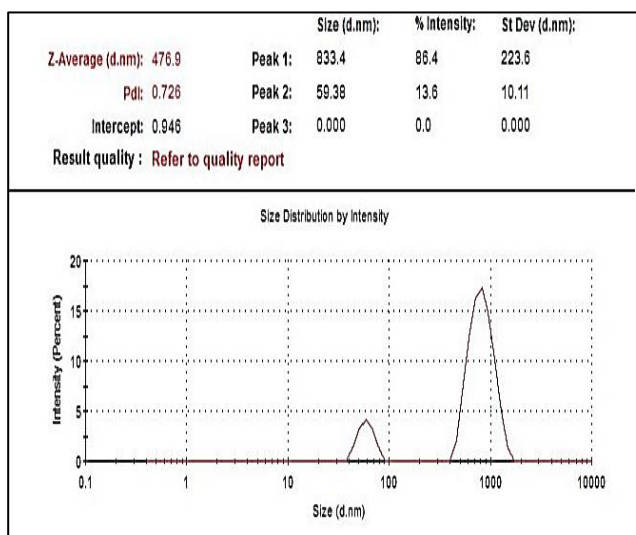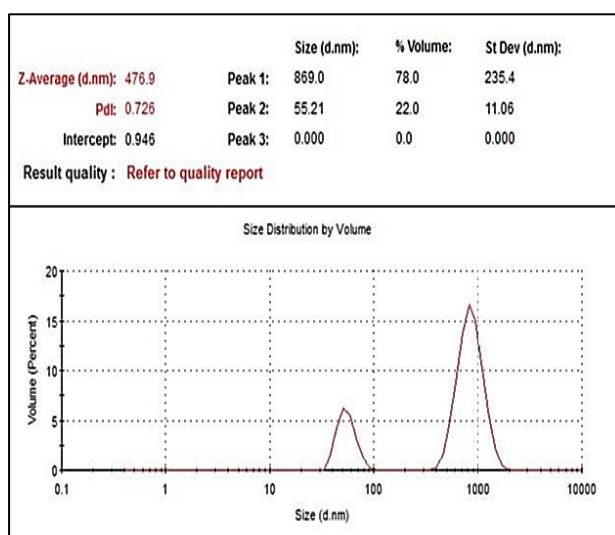

## B. Low Fe/Mg-CA

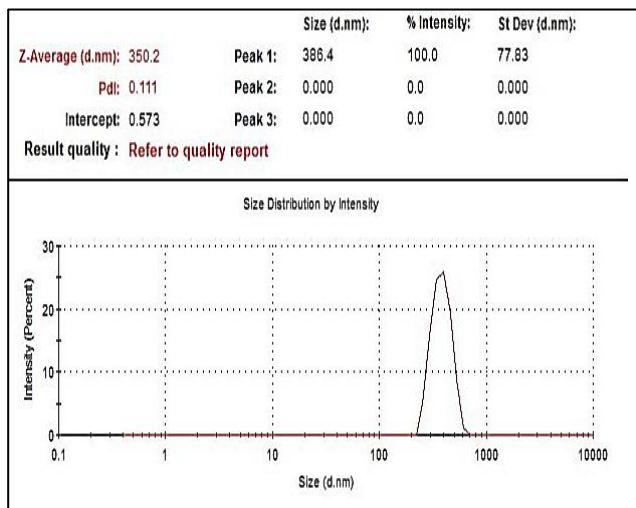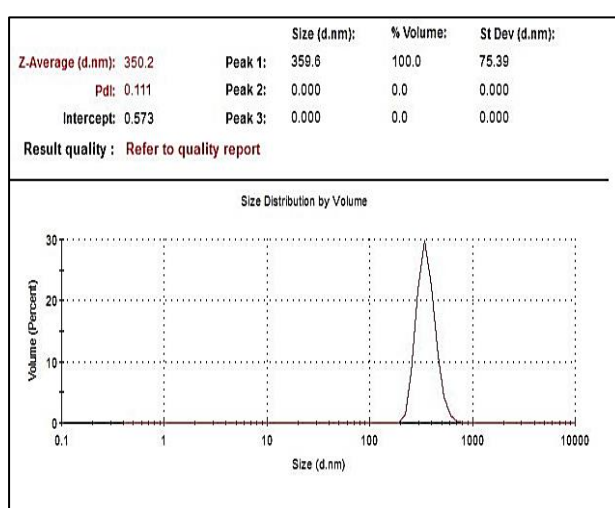

C.

### High Fe/Mg-CA

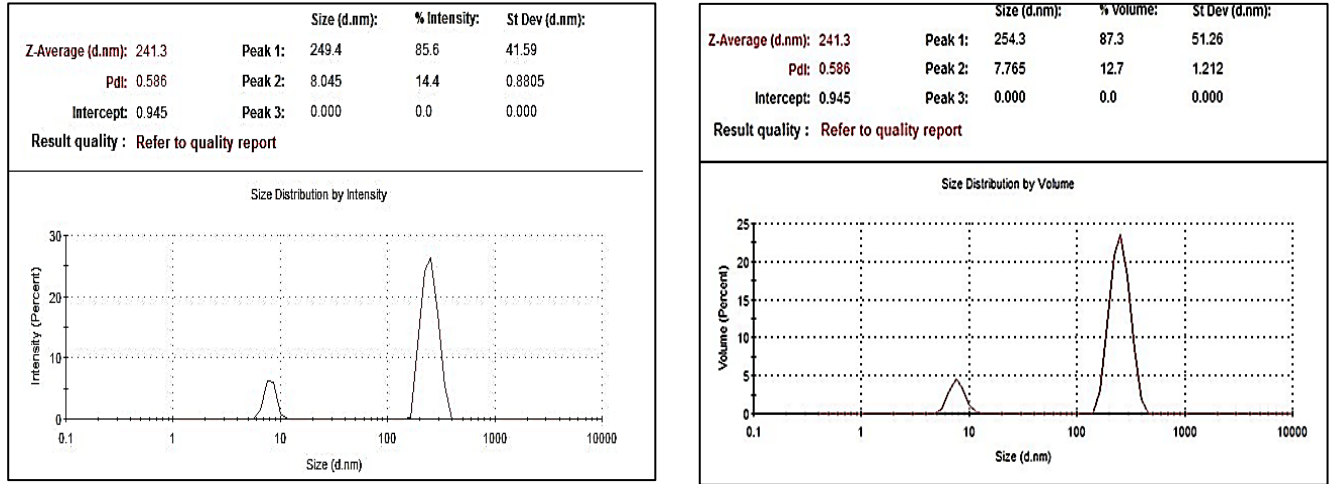

**Figure S1:** Representative data for dynamic light scattering technique used to demonstrate the particle size distribution by intensity and volume for CA and Fe/Mg-CA NPs. (A) Size distribution by intensity and volume for CA NPs. (B) Size distribution by intensity and volume for low Fe/Mg-CA NPs. (C) Size distribution by intensity and volume for high Fe/Mg-CA NPs.

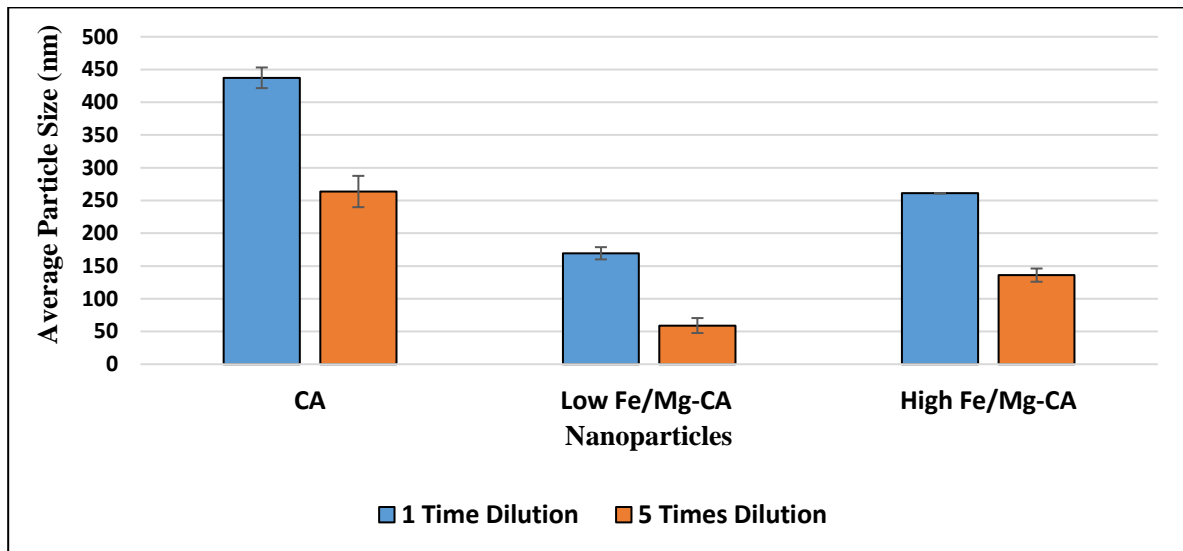

**Figure S2:** Comparison of z-average diameter of 1× and 5× diluted samples of CA, low Fe/Mg-CA and high Fe/Mg-CA NPs.

**A. CA**

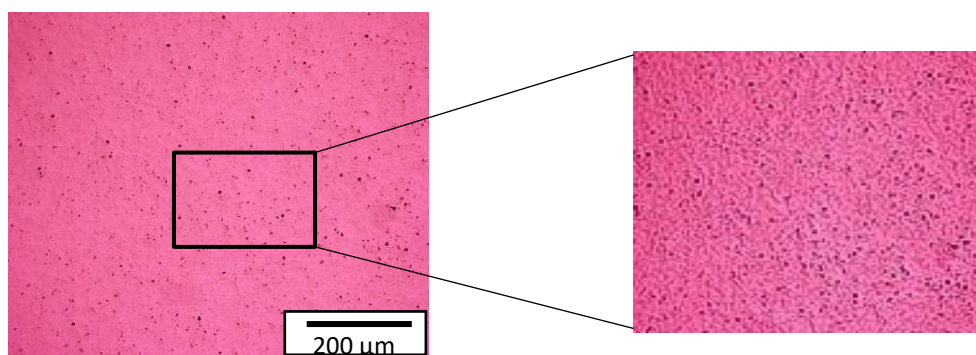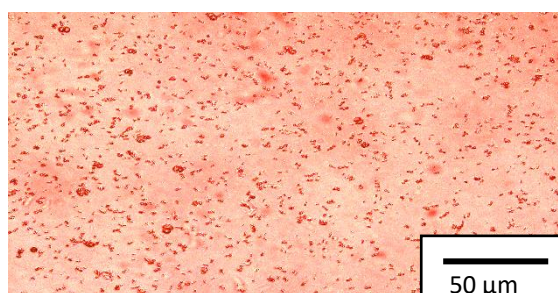

**B. Low Fe/Mg-CA**

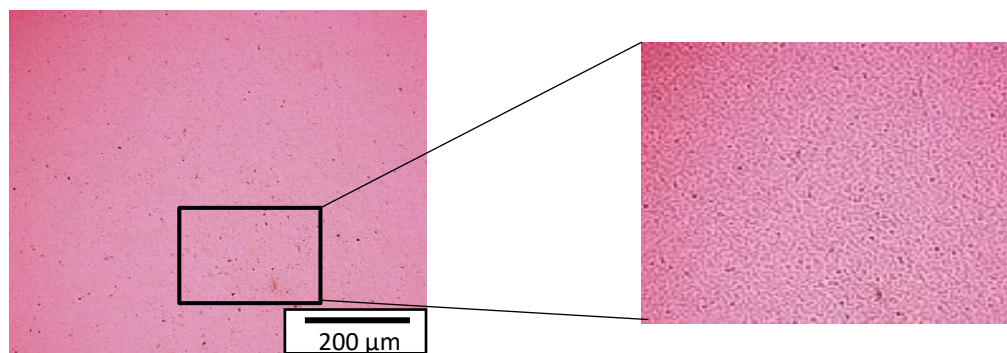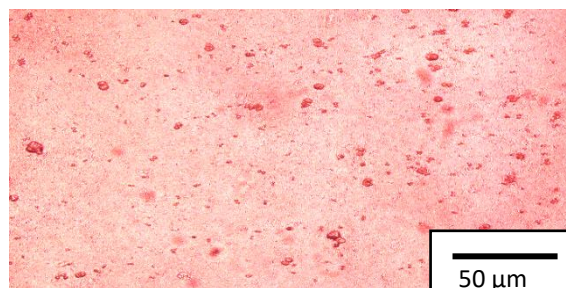

### C. High Fe/Mg-CA

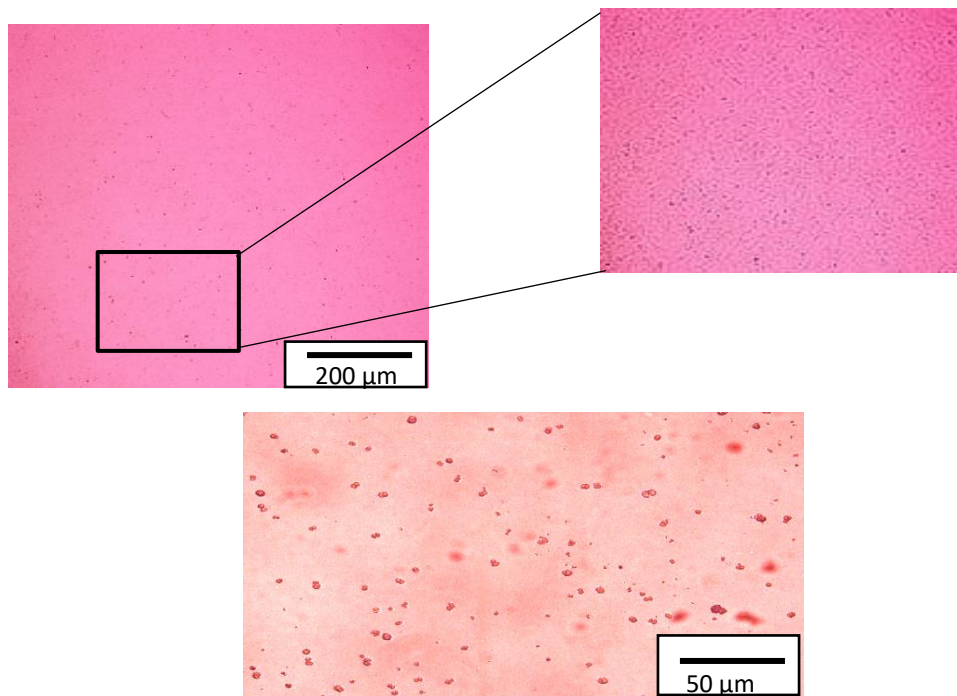

**Figure S3:** Observation of particle aggregates by optical microscopy with different magnifications, i.e. 40× (scale bar of 200 μm), 10× (scale bar of 50 μm) in presence of 10% FBS after 1 hour incubation. (A) CA, (B) Low Fe/Mg-CA and (C) High Fe/Mg-CA.

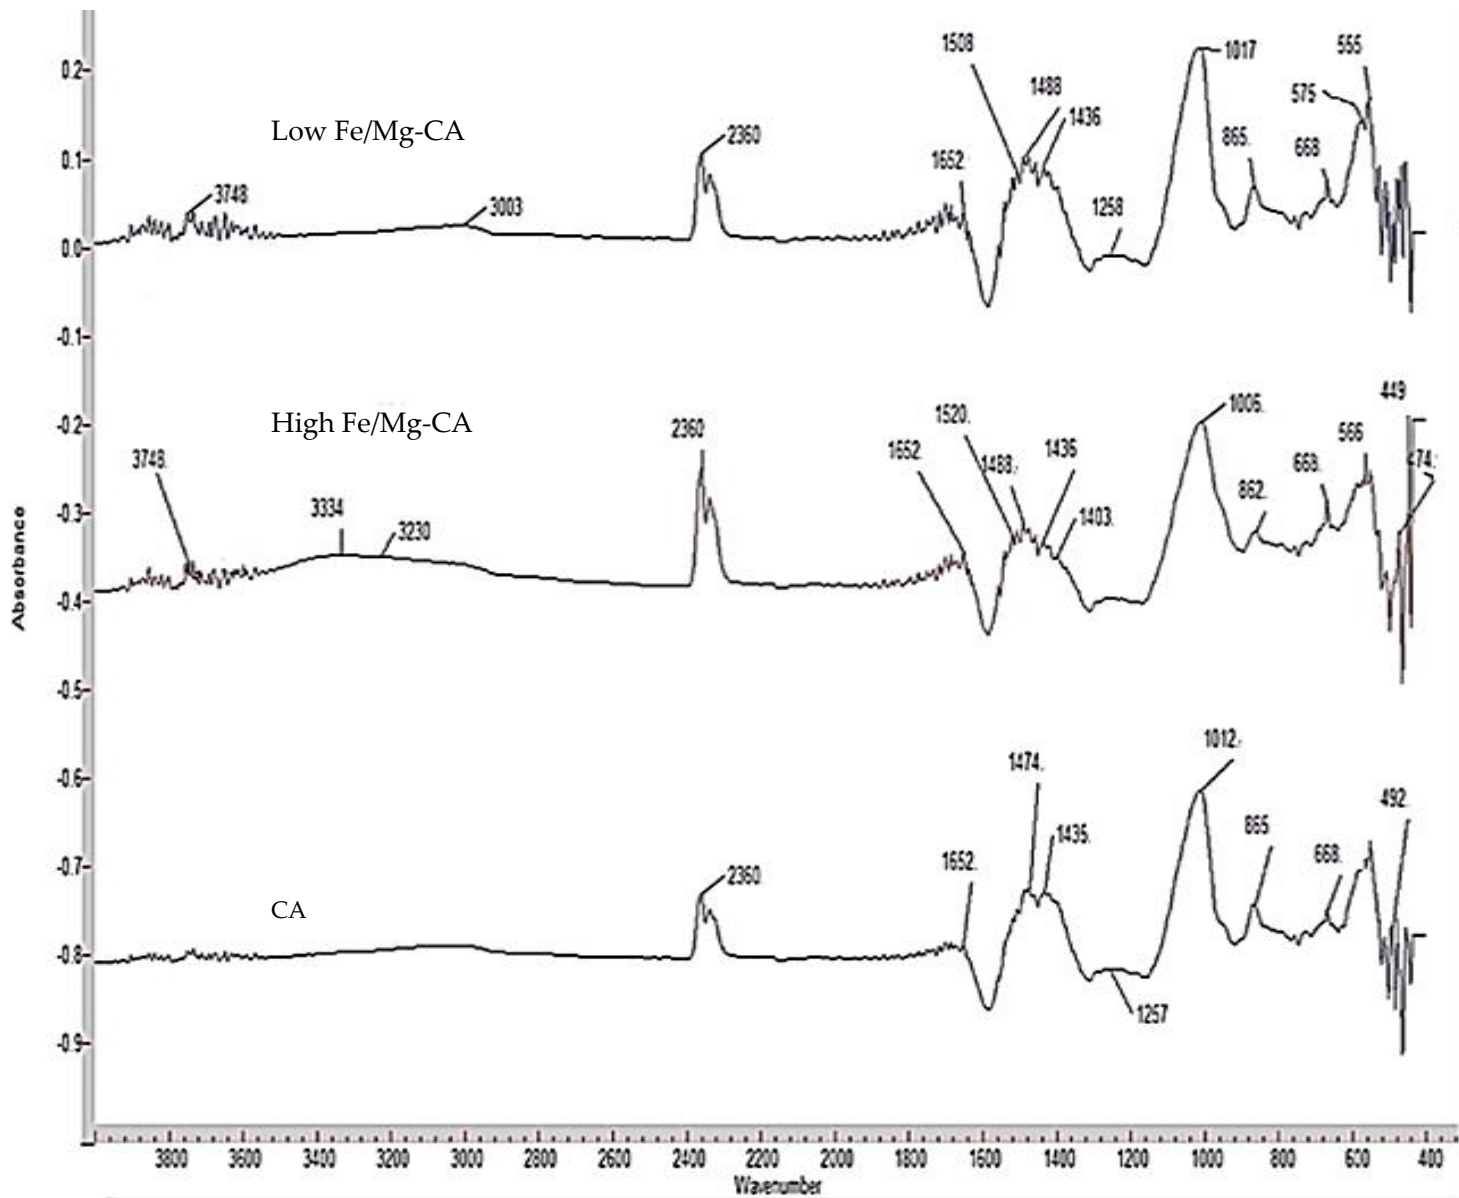

**Figure S4:** FTIR spectra for CA formulated with 40 mM  $\text{Ca}^{2+}$ , low Fe/Mg-CA generated with 40 mM  $\text{Ca}^{2+}$ , 10  $\mu\text{M}$   $\text{Fe}^{3+}$  and 40 mM  $\text{Mg}^{2+}$ , and high Fe/Mg-CA synthesized with 40 mM  $\text{Ca}^{2+}$ , 50  $\mu\text{M}$   $\text{Fe}^{3+}$  and 120 mM  $\text{Mg}^{2+}$ . The change in formulation was done in order to obtain significant amount of lyophilized powder for the analysis.



# CA

0 H

4 H

A.

B.

|                         | Size (d.nm):  | % Volume: | St Dev (d.nm): |
|-------------------------|---------------|-----------|----------------|
| Z-Average (d.nm): 476.9 | Peak 1: 869.0 | 78.0      | 235.4          |
| Pdl: 0.726              | Peak 2: 55.21 | 22.0      | 11.06          |
| Intercept: 0.946        | Peak 3: 0.000 | 0.0       | 0.000          |

|                         | Size (d.nm):  | % Volume: | St Dev (d.nm): |
|-------------------------|---------------|-----------|----------------|
| Z-Average (d.nm): 275.1 | Peak 1: 451.4 | 0.5       | 127.0          |
| Pdl: 0.459              | Peak 2: 54.35 | 0.9       | 16.72          |
| Intercept: 0.975        | Peak 3: 6.403 | 98.6      | 2.279          |

Result quality : Refer to quality report

Result quality : Refer to quality report

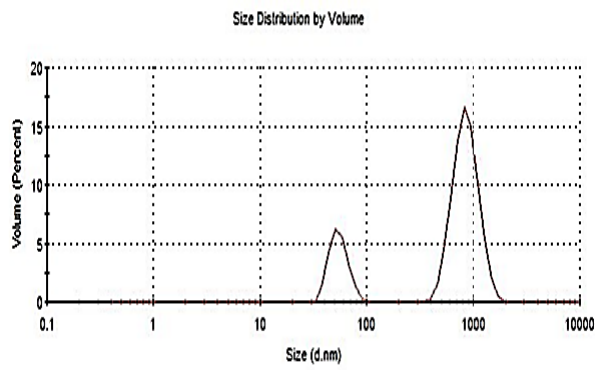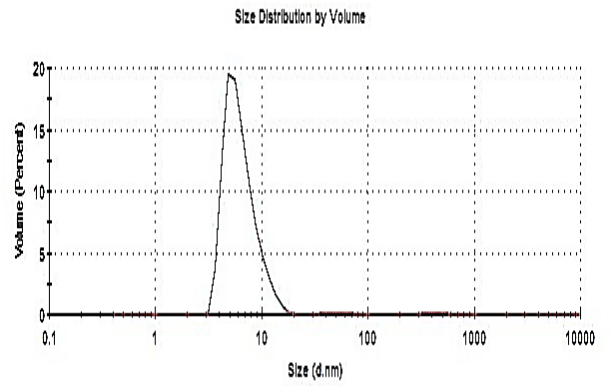

24 H

72 H

C.

D.

|                         | Size (d.nm):  | % Volume: | St Dev (d.nm): |
|-------------------------|---------------|-----------|----------------|
| Z-Average (d.nm): 334.8 | Peak 1: 334.7 | 100.0     | 69.19          |
| Pdl: 0.343              | Peak 2: 0.000 | 0.0       | 0.000          |
| Intercept: 0.939        | Peak 3: 0.000 | 0.0       | 0.000          |

|                         | Size (d.nm):  | % Volume: | St Dev (d.nm): |
|-------------------------|---------------|-----------|----------------|
| Z-Average (d.nm): 361.9 | Peak 1: 294.1 | 100.0     | 46.41          |
| Pdl: 0.652              | Peak 2: 0.000 | 0.0       | 0.000          |
| Intercept: 0.949        | Peak 3: 0.000 | 0.0       | 0.000          |

Result quality : Refer to quality report

Result quality : Refer to quality report

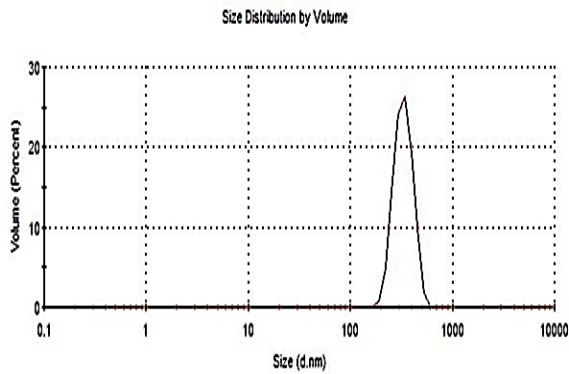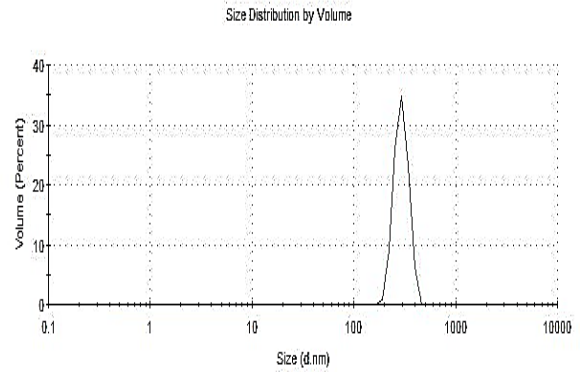

## Low Fe/Mg-CA

0 H

4 H

E.

F.

|                         | Size (d.nm):  | % Volume: | St Dev (d.nm): |
|-------------------------|---------------|-----------|----------------|
| Z-Average (d.nm): 350.2 | Peak 1: 359.6 | 100.0     | 75.39          |
| Pdl: 0.111              | Peak 2: 0.000 | 0.0       | 0.000          |
| Intercept: 0.573        | Peak 3: 0.000 | 0.0       | 0.000          |

|                         | Size (d.nm):  | % Volume: | St Dev (d.nm): |
|-------------------------|---------------|-----------|----------------|
| Z-Average (d.nm): 223.5 | Peak 1: 273.0 | 0.1       | 88.54          |
| Pdl: 0.412              | Peak 2: 17.98 | 3.9       | 3.904          |
| Intercept: 0.979        | Peak 3: 5.639 | 96.0      | 1.188          |

Result quality : Refer to quality report

Result quality : Refer to quality report

Size Distribution by Volume

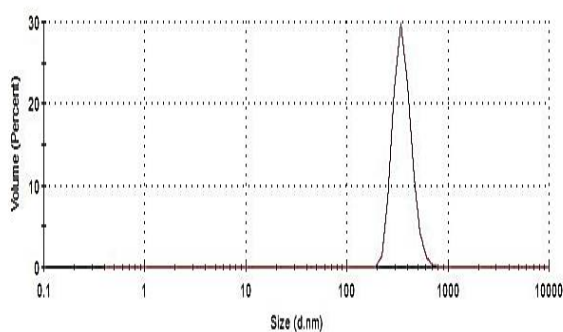

Size Distribution by Volume

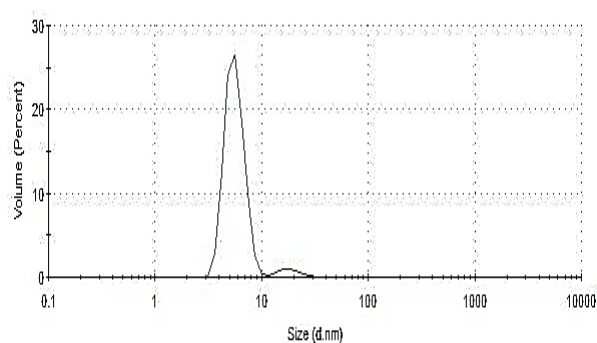

24 H

72 H

G.

H.

|                         | Size (d.nm):  | % Volume: | St Dev (d.nm): |
|-------------------------|---------------|-----------|----------------|
| Z-Average (d.nm): 296.4 | Peak 1: 234.9 | 100.0     | 42.79          |
| Pdl: 0.031              | Peak 2: 0.000 | 0.0       | 0.000          |
| Intercept: 0.971        | Peak 3: 0.000 | 0.0       | 0.000          |

|                         | Size (d.nm):  | % Volume: | St Dev (d.nm): |
|-------------------------|---------------|-----------|----------------|
| Z-Average (d.nm): 374.9 | Peak 1: 440.0 | 100.0     | 76.14          |
| Pdl: 0.264              | Peak 2: 0.000 | 0.0       | 0.000          |
| Intercept: 0.947        | Peak 3: 0.000 | 0.0       | 0.000          |

Result quality : Refer to quality report

Result quality : Refer to quality report

Size Distribution by Volume

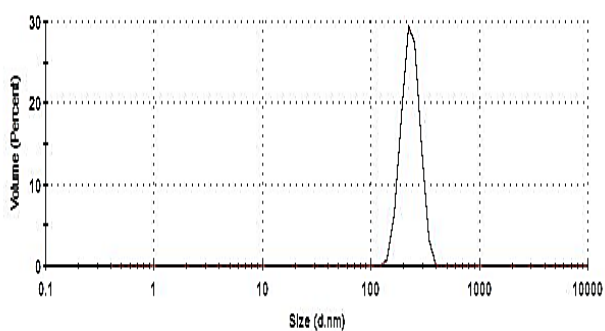

Size Distribution by Volume

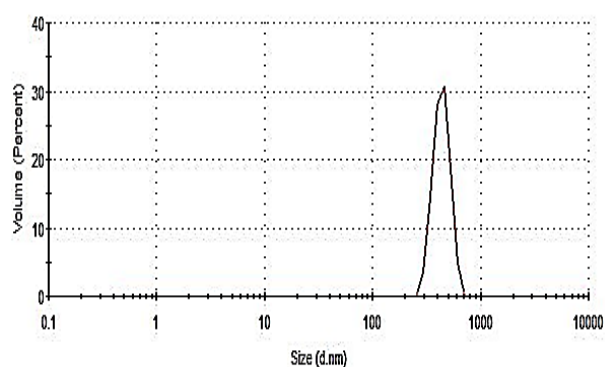

## High Fe/Mg-CA

0 Hour

4 H

I.

|                         | Size (d.nm):  | % Volume: | St Dev (d.nm): |
|-------------------------|---------------|-----------|----------------|
| Z-Average (d.nm): 241.3 | Peak 1: 254.3 | 87.3      | 51.26          |
| Pdl: 0.586              | Peak 2: 7.765 | 12.7      | 1.212          |
| Intercept: 0.945        | Peak 3: 0.000 | 0.0       | 0.000          |

Result quality : Refer to quality report

J.

|                         | Size (d.nm):  | % Volume: | St Dev (d.nm): |
|-------------------------|---------------|-----------|----------------|
| Z-Average (d.nm): 197.1 | Peak 1: 332.7 | 0.1       | 106.9          |
| Pdl: 0.380              | Peak 2: 124.2 | 0.0       | 26.58          |
| Intercept: 0.974        | Peak 3: 16.37 | 5.3       | 3.770          |

Result quality : Refer to quality report

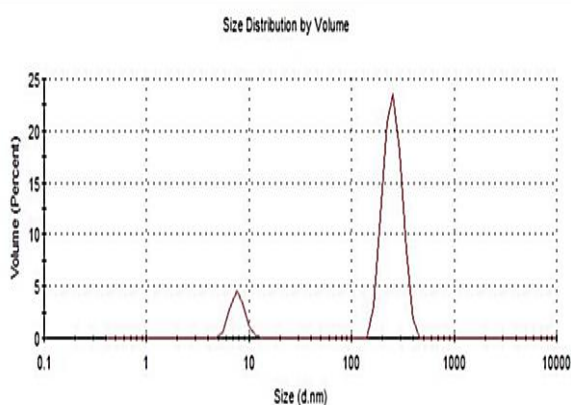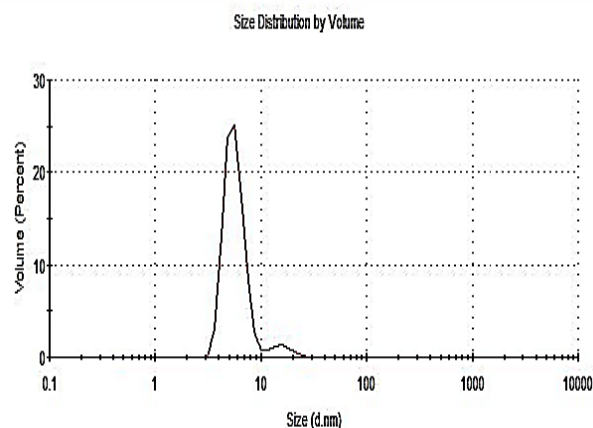

24 H

72 H

K.

|                         | Size (d.nm):  | % Volume: | St Dev (d.nm): |
|-------------------------|---------------|-----------|----------------|
| Z-Average (d.nm): 347.9 | Peak 1: 335.4 | 100.0     | 66.78          |
| Pdl: 0.353              | Peak 2: 0.000 | 0.0       | 0.000          |
| Intercept: 0.964        | Peak 3: 0.000 | 0.0       | 0.000          |

Result quality : Refer to quality report

L.

|                         | Size (d.nm):  | % Volume: | St Dev (d.nm): |
|-------------------------|---------------|-----------|----------------|
| Z-Average (d.nm): 380.7 | Peak 1: 454.8 | 100.0     | 84.55          |
| Pdl: 0.312              | Peak 2: 0.000 | 0.0       | 0.000          |
| Intercept: 0.950        | Peak 3: 0.000 | 0.0       | 0.000          |

Result quality : Refer to quality report

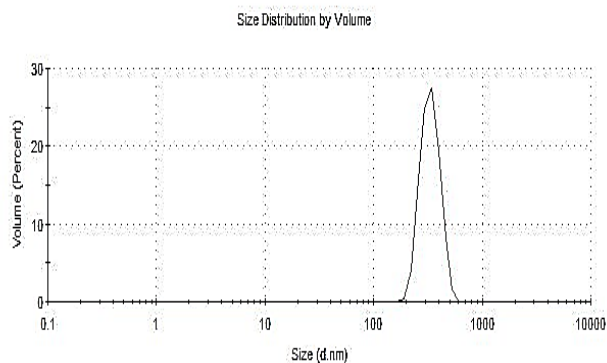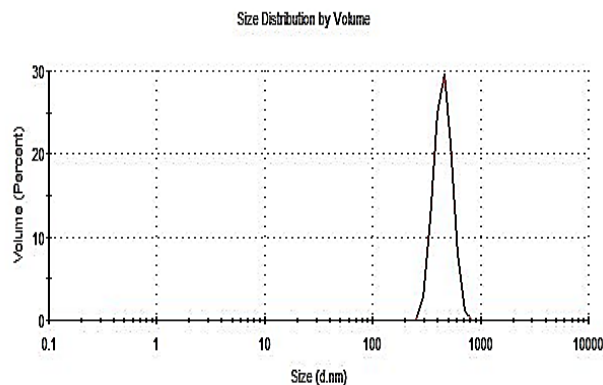

**Figure S5:** Representative data for dynamic light scattering technique used to demonstrate the PDI value and particle size distribution by volume for CA and Fe/Mg-CA NPs. (A) CA at 0 h. (B) CA at 4 h. (C) CA at 24 h. (D) CA at 72 h. (E) Low Fe/Mg-CA at 0 h. (F) Low Fe/Mg-CA 4 h. (G) Low Fe/Mg-CA at 24 h. (H) Low Fe/Mg-CA at 72 h. (I) High Fe/Mg-CA at 0 h. (J) High Fe/Mg-CA at 4 h. (K) High Fe/Mg-CA at 24 h. (L) High Fe/Mg-CA at 72 h.



The representative data for the elemental analysis of CA, low Fe/Mg-CA and high Fe/Mg-CA were presented below-

A. CA

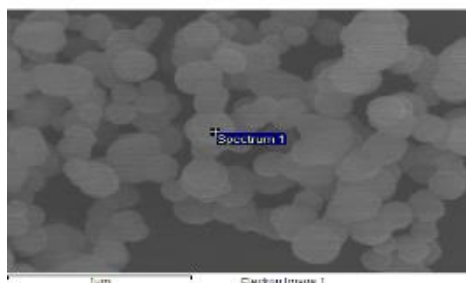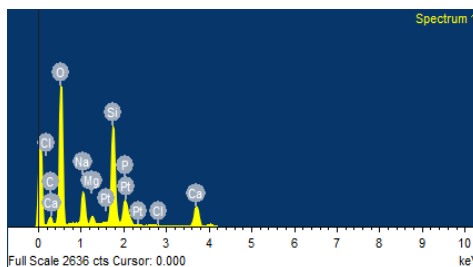

**Table S1:** Elemental analysis for CA.

| Element | Weight % | Atomic % |
|---------|----------|----------|
| Ca      | 11.67    | 12.76    |
| Mg      | 1.09     | 0.94     |
| C       | 5.04     | 8.86     |
| P       | 4.24     | 2.89     |
| O       | 47.38    | 62.55    |
| Si      | 16.97    | 12.76    |
| Pt      | 8.08     | 0.87     |
| Na      | 5.16     | 4.74     |
| Cl      | 0.34     | 0.22     |
| Total   | 100      |          |

B. Low Fe/Mg-CA

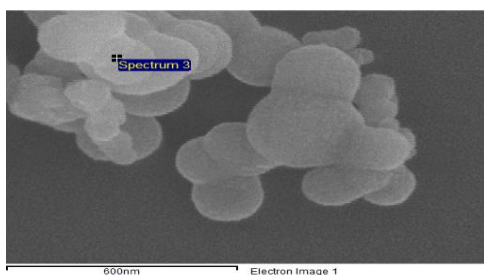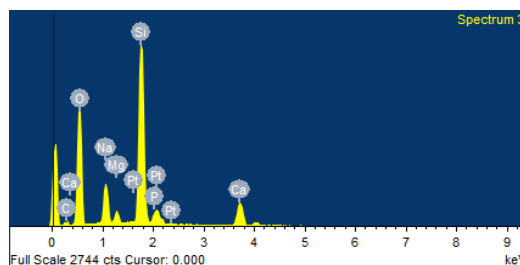

**Table S2:** Elemental analysis for low Fe/Mg-CA.

| Element | Weight % | Atomic % |
|---------|----------|----------|
| Ca      | 6.71     | 3.39     |
| Mg      | 1.55     | 1.29     |
| C       | 4.57     | 7.70     |
| P       | 1.46     | 0.95     |
| O       | 49.49    | 62.58    |
| Si      | 24.48    | 17.63    |
| Pt      | 4.98     | 0.52     |
| Na      | 6.75     | 5.94     |
| Total   | 100      |          |

### C. High Fe/Mg-CA

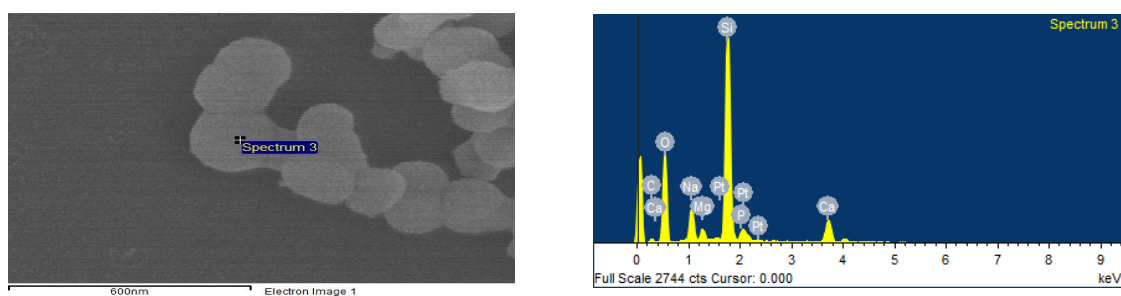

**Table S3:** Elemental analysis for high Fe/Mg-CA.

| Element | Weight % | Atomic % |
|---------|----------|----------|
| Ca      | 7.1      | 3.69     |
| Mg      | 1.74     | 1.49     |
| C       | 4.44     | 7.69     |
| P       | 1.24     | 0.83     |
| O       | 44.6     | 58.03    |
| Si      | 30.47    | 22.58    |
| Pt      | 4.69     | 0.5      |
| Na      | 5.73     | 5.19     |
| Total   | 100      |          |

**Figure S6:** Representative data for the elemental analysis for (A) CA (B) Low Fe/Mg-CA (C) High Fe/Mg-CA.

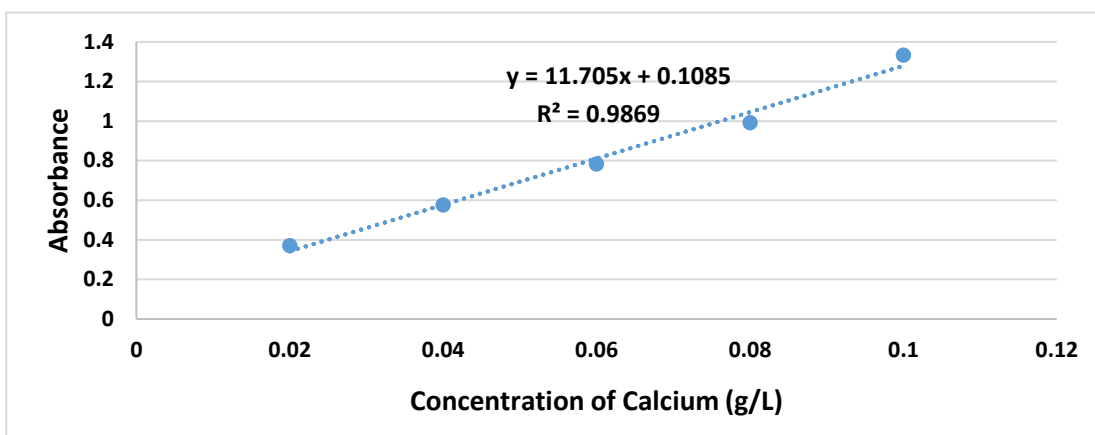

Figure S7: Standard curve for Calcium.

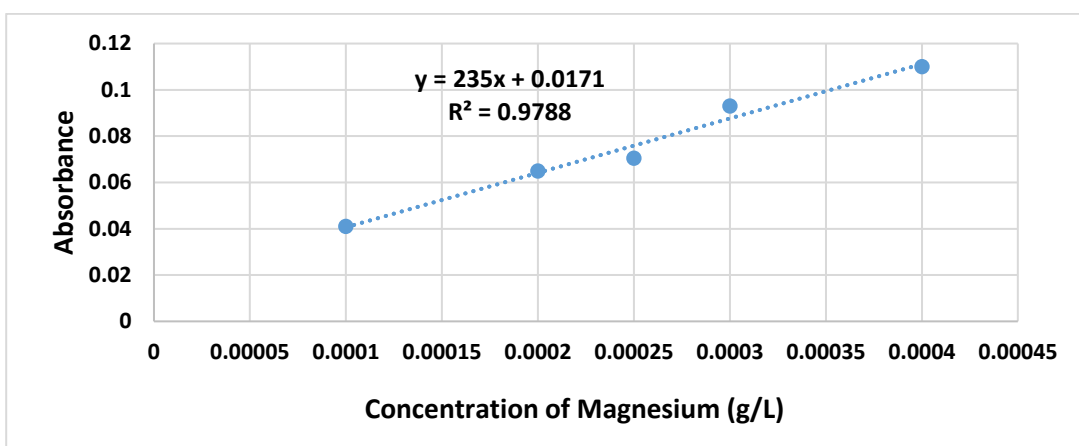

Figure S8: Standard curve for Magnesium.

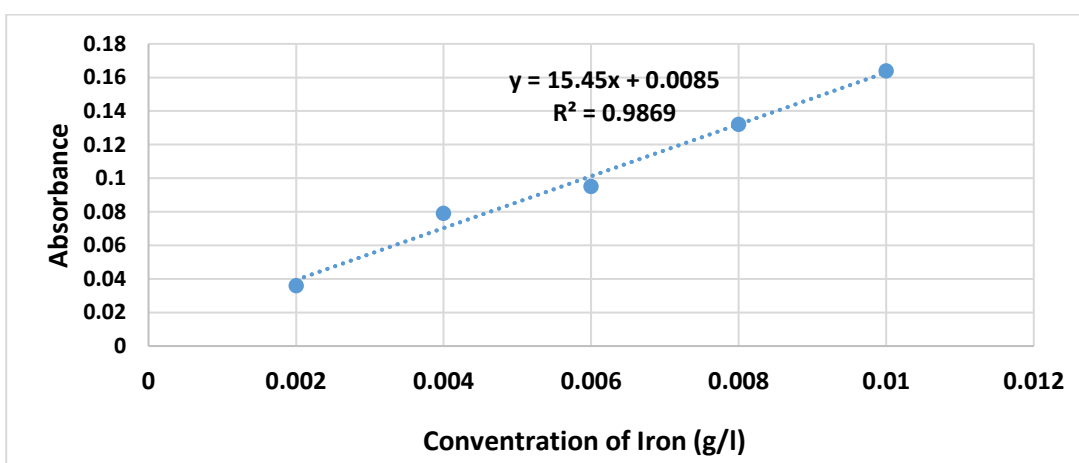

Figure S9: Standard curve for Iron.

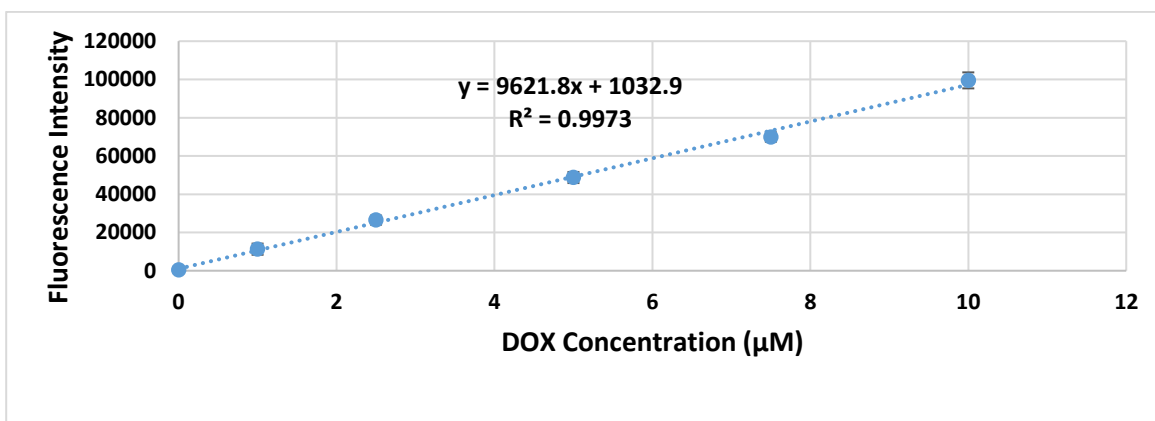

**Figure S10:** Standard Curve for free DOX at different concentrations.

**Table S4:** Cytotoxicity enhancement (%) of DOX-CA and DOX-Fe/Mg-CA NPs by thiazolyl blue tetrazolium bromide (MTT) assay in Michigan Cancer Foundation-7 (MCF-7) cells after 48 h of treatment.

| NP's with different concentrations of DOX | Cytotoxicity enhancement (%) in MCF-7 cells |
|-------------------------------------------|---------------------------------------------|
| CA+DOX 1 nM                               | 1± 0.45                                     |
| CA+DOX 10 nM                              | 3 ± 0.38                                    |
| CA+DOX 100 nM                             | 2 ± 0.29                                    |
| CA+DOX 1µM                                | 11± 0.81                                    |
| Low Fe/Mg-CA+DOX 1 nM                     | 3± 0.48                                     |
| Low Fe/Mg-CA+DOX 10 nM                    | 5± 0.79                                     |
| Low Fe/Mg-CA+DOX 100 nM                   | 15± 0.29                                    |
| Low Fe/Mg-CA+DOX 1µM                      | 11± 0.82                                    |
| High Fe/Mg-CA+DOX 1 nM                    | 2± 0.48                                     |
| High Fe/Mg-CA+DOX 10 nM                   | 6± 0.38                                     |
| High Fe/Mg-CA+DOX 100 nM                  | 12± 0.28                                    |
| High Fe/Mg-CA+DOX 1µM                     | 13± 0.44                                    |

**Table S5.** List of identified proteins with CA in 10% FBS along with their isoelectric point (pI) and major biological functions.

| Functional classification of protein | Identified Protein                                       | pI   | Detailed Function                                                                                                                                                                                                |
|--------------------------------------|----------------------------------------------------------|------|------------------------------------------------------------------------------------------------------------------------------------------------------------------------------------------------------------------|
| Transport Protein                    | ALB protein                                              | 5.7  | 1. Zn <sup>2+</sup> binding                                                                                                                                                                                      |
|                                      | Serum Albumin                                            | 5.53 | 1. Transport<br>2. Lipid binding<br>3. Metal binding<br>4. Bilirubin binding<br>5. Helps maintain osmolarity of blood<br>6. Dysopsonin                                                                           |
|                                      | Alpha-2-HS glycoprotein                                  | 5.94 | 1. Enhance endocytosis<br>2. Ca <sup>2+</sup> binding<br>3. Post-translational protein modification<br>4. Protein metabolism                                                                                     |
|                                      | cDNA FLJ51509                                            | 7.42 | 1. Behaves similar to Alpha-fetoprotein, i.e- it takes part in metal, fatty acids and bilirubin binding, involved in cellular protein and progesterone metabolism                                                |
|                                      | Transthyretin                                            | 5.6  | 1. Thyroid hormone binding<br>2. Identical protein binding<br>3. Transport iron<br>4. Transport thyroxine to the brain<br>5. Cellular protein metabolism<br>6. Neutrophil degranulation<br>7. Retinol metabolism |
|                                      | Serotransferrin                                          | 6.81 | 1. Fe <sup>3+</sup> binding<br>2. Bicarbonate binding<br>3. Transport iron                                                                                                                                       |
|                                      | Transferrin variant                                      | 6.68 | 1. Fe <sup>3+</sup> binding<br>2. Transport Fe <sup>3+</sup> within transmembrane<br>3. Involved in iron ion homeostasis in cells                                                                                |
|                                      | Transferrin                                              | 6.97 | 1. Fe <sup>3+</sup> binding<br>2. Transport Fe <sup>3+</sup> within transmembrane<br>3. Involved in iron ion homeostasis in cells                                                                                |
|                                      | LMAN1 protein                                            | 6.3  | 1. Mannose (monosaccharide hexose) binding.<br>2. Endoplasmic reticulum (ER) to golgi body facilitated transport                                                                                                 |
|                                      | Globin C1                                                | 9.79 | 1. Metal binding (binding with Ca <sup>2+</sup> , Mg <sup>2+</sup> and Fe <sup>3+</sup> )<br>2. Heme-binding<br>3. Transport oxygen                                                                              |
|                                      | Globin B1                                                | 6.75 | 1. Fe <sup>2+</sup> , Fe <sup>3+</sup> binding<br>2. Heme binding<br>3. Organic acid binding<br>4. Oxygen binding<br>5. Hemoglobin alpha binding<br>6. Transports oxygen                                         |
|                                      | Globin A1                                                | 7.02 | 1. Fe <sup>2+</sup> , Fe <sup>3+</sup> binding<br>2. Heme binding<br>3. Oxygen binding<br>4. Transports oxygen                                                                                                   |
|                                      | Alpha-1-acid glycoprotein (positive acute phase protein) | 4.93 | 1. Behave as transport protein in blood stream.<br>2. Involved in regulation of immune system.<br>3. Inhibits aggregation of platelets and neutrophils.                                                          |



|  |                                                |      |                                                                                                                                                                                                                                                               |
|--|------------------------------------------------|------|---------------------------------------------------------------------------------------------------------------------------------------------------------------------------------------------------------------------------------------------------------------|
|  | Mutant hemoglobin alpha 1 globin chain         | 8.08 | <ol style="list-style-type: none"> <li>1. Fe<sup>2+</sup>, Fe<sup>3+</sup> binding</li> <li>2. Heme binding</li> <li>3. Oxygen binding</li> <li>4. Transport oxygen</li> <li>5. Transport bicarbonate</li> </ol>                                              |
|  | Hemoglobin alpha-1 globin chain                | 8.08 | <ol style="list-style-type: none"> <li>1. Fe<sup>2+</sup>, Fe<sup>3+</sup> binding</li> <li>2. Heme binding</li> <li>3. Oxygen binding</li> <li>4. Transport oxygen</li> <li>5. Transport bicarbonate</li> </ol>                                              |
|  | Hemoglobin subunit alpha                       | 8.72 | <ol style="list-style-type: none"> <li>1. Fe<sup>2+</sup>, Fe<sup>3+</sup> binding</li> <li>2. Heme binding</li> <li>3. Oxygen binding</li> <li>4. Transport oxygen</li> </ol>                                                                                |
|  | Alpha-2 globin chain                           | 8.72 | <ol style="list-style-type: none"> <li>1. Fe<sup>2+</sup>, Fe<sup>3+</sup> binding</li> <li>2. Heme binding</li> <li>3. Oxygen binding</li> <li>4. Transport oxygen</li> <li>5. Transport bicarbonate</li> </ol>                                              |
|  | Mutant hemoglobin alpha 2 globin chain         | 8.72 | <ol style="list-style-type: none"> <li>1. Fe<sup>2+</sup>, Fe<sup>3+</sup> binding</li> <li>2. Heme binding</li> <li>3. Oxygen binding</li> <li>4. Transport oxygen</li> </ol>                                                                                |
|  | Lactoferrin                                    | 8.70 | <ol style="list-style-type: none"> <li>1. Fe<sup>2+</sup>, Fe<sup>3+</sup> binding</li> <li>2. Involved in serine-type endopeptidase activity</li> <li>3. Engender antimicrobial humoral response</li> <li>4. Regulates the production of cytokine</li> </ol> |
|  | Beta-globin protein                            | 6.64 | <ol style="list-style-type: none"> <li>1. Heme binding</li> <li>2. Metal ion binding</li> <li>3. Oxygen binding</li> <li>4. Transports oxygen</li> <li>5. Makes haemoglobin (HbA) along with alpha-globin in adults</li> </ol>                                |
|  | Hemoglobin fetal subunit beta                  | 6.75 | <ol style="list-style-type: none"> <li>1. Fe<sup>2+</sup>, Fe<sup>3+</sup> binding</li> <li>2. Heme binding</li> <li>3. Organic acid binding</li> <li>4. Oxygen binding</li> <li>5. Hemoglobin alpha binding</li> <li>6. Transports oxygen</li> </ol>         |
|  | Truncated beta-globin                          | 7.96 | <ol style="list-style-type: none"> <li>1. Heme binding</li> <li>2. Oxygen binding</li> </ol>                                                                                                                                                                  |
|  | Mutant beta-globin                             | 7.92 | <ol style="list-style-type: none"> <li>1. Heme binding</li> <li>2. Oxygen binding</li> <li>3. Transports oxygen</li> </ol>                                                                                                                                    |
|  | Beta-globin chain                              | 5.57 | <ol style="list-style-type: none"> <li>1. Fe<sup>2+</sup>, Fe<sup>3+</sup> binding</li> <li>2. Heme binding</li> <li>3. Oxygen binding</li> <li>4. Transport oxygen</li> </ol>                                                                                |
|  | Hemoglobin subunit beta                        | 6.25 | <ol style="list-style-type: none"> <li>1. Heme binding</li> <li>2. Oxygen binding</li> <li>3. Transports oxygen</li> </ol>                                                                                                                                    |
|  | Hemoglobin beta chain                          | 6.74 | <ol style="list-style-type: none"> <li>1. Fe<sup>2+</sup>, Fe<sup>3+</sup> binding</li> <li>2. Heme binding</li> <li>3. Oxygen binding</li> <li>4. Transport oxygen</li> </ol>                                                                                |
|  | Hemoglobin beta chain variant Hb.Sinai-Bel Air | 5.41 | <ol style="list-style-type: none"> <li>1. Fe<sup>2+</sup>, Fe<sup>3+</sup> binding</li> <li>2. Heme binding</li> <li>3. Oxygen binding</li> </ol>                                                                                                             |

|                              |                                                        |       |                                                                                                                                                                                                                                                                              |
|------------------------------|--------------------------------------------------------|-------|------------------------------------------------------------------------------------------------------------------------------------------------------------------------------------------------------------------------------------------------------------------------------|
|                              |                                                        |       | 4. Transport oxygen                                                                                                                                                                                                                                                          |
|                              | Hemoglobin beta chain variant Hb-I_Toulouse            | 5.41  | 1. Fe <sup>2+</sup> , Fe <sup>3+</sup> binding<br>2. Heme binding<br>3. Oxygen binding<br>4. Transport oxygen                                                                                                                                                                |
|                              | Vitamin D-binding protein                              | 5.2   | 1. Vitamin D binding<br>2. Transport vitamin within transmembrane                                                                                                                                                                                                            |
| <b>Cell adhesive protein</b> | cDNA FLJ54111                                          | 6.95  | 1. Ca <sup>2+</sup> binding<br>2. Collagen binding                                                                                                                                                                                                                           |
| <b>Coagulation protein</b>   | Prothrombin                                            | 5.64  | 1. Non-covalently calcium ions (Ca <sup>2+</sup> ) binding.<br>2. Blood coagulation<br>3. Involved in serine-type endopeptidase activity                                                                                                                                     |
| <b>Metabolic Protein</b>     | Adiponectin                                            | 5.42  | 1. Involved in fat metabolism and hormonal activity<br>2. Identical protein binding<br>3. Sialic acid binding<br>4. Signaling receptor binding<br>5. Involved in glucose metabolism<br>6. Involved in the negative regulation of macrophage differentiation and phagocytosis |
| <b>Protease inhibitor</b>    | Kininogen-1                                            | 6.02  | 1. Inhibits thiol proteases<br>2. Inhibits the thrombin- and plasmin-induced aggregation of thrombocytes in blood coagulation<br>3. Heparin binding<br>4. Zinc ion binding<br>5. Regulates cell adhesion                                                                     |
|                              | KNG1 protein                                           | 6.4   | 1. Inhibits cysteine-type endopeptidase                                                                                                                                                                                                                                      |
|                              | Fetuin-B                                               | 8.7   | 1. Inhibits metalloenzyme, metalloprotease and protease, i.e- inhibits cysteine-type endopeptidase and metallo-endopeptidase.<br>2. Involved in fertilization.                                                                                                               |
|                              | Alpha-1-antitrypsin                                    | 6.05  | 1. Inhibits protease and serine protease.<br>2. Inhibits trypsin, chymotrypsin and plasminogen activator.<br>3. Identical protein and protease binding.                                                                                                                      |
| <b>Structural Protein</b>    | Keratin, type I cytoskeletal 10                        | 5.13  | 1. Cross linking of peptides<br>2. Protein heterodimerization and heterotetramerization activity<br>3. Keratinization                                                                                                                                                        |
|                              | Keratin 1                                              | 8.15  | 1. Involved in structural molecular activity                                                                                                                                                                                                                                 |
|                              | KRT6A protein                                          | 8.09  | 1. Involved in the structural molecular activity                                                                                                                                                                                                                             |
|                              | Keratin, type I cytoskeletal 14                        | 5.09  | 1. Responding to Zn <sup>2+</sup><br>2. Keratin filament binding<br>3. Structural constituent of cytoskeleton<br>4. Keratinization                                                                                                                                           |
|                              | Histone H2B                                            | 10.32 | 1. DNA binding<br>2. Involved in protein heterodimerization and nucleosome assembly                                                                                                                                                                                          |
| <b>Regulatory Protein</b>    | Junction mediating and regulatory protein p53 cofactor | 5.95  | 1. Actin binding.<br>2. Arp2/3 complex binding<br>3. Involved in transcription coactivator activity.<br>4. Involved in cell cycle arrest.<br>5. Involved in positive regulation of apoptosis.                                                                                |
| <b>Others</b>                | Uncharacterized protein                                | 6.28  | 1. Fe <sup>2+</sup> , Fe <sup>3+</sup> binding<br>2. Heme binding<br>3. Oxygen binding<br>4. Transport oxygen                                                                                                                                                                |

|  |                                    |      |                                                                                                                                                     |
|--|------------------------------------|------|-----------------------------------------------------------------------------------------------------------------------------------------------------|
|  | Epididymis secretory protein Li 51 | 5.4  | 1. Vitamin D binding<br>2. Transports vitamin transmembrane                                                                                         |
|  | Alpha-fetoprotein                  | 4.57 | 1. Metal (copper, nickel) binding<br>2. Fatty acids binding<br>3. Bilirubin binding<br>4. Cellular protein metabolism<br>5. Progesterone metabolism |
|  | cDNA FLJ95666                      | 5.92 | 1. Involved in aspirin acetylated lysine<br>2. Bilirubin binding                                                                                    |
|  | cDNA FLJ57154                      | 6.29 | 1. Helps in heterologous expression                                                                                                                 |
|  | cDNA FLJ55606                      | 5.84 | 1. Cysteine-type endopeptidase inhibitor                                                                                                            |

**Table S6.** List of identified proteins with low Fe/Mg-CA in 10% FBS along with their isoelectric point (pI) and major biological functions.

| Functional classification of protein | Identified Protein                     | pI   | Detailed Function                                                                                                                                                                                                                                |
|--------------------------------------|----------------------------------------|------|--------------------------------------------------------------------------------------------------------------------------------------------------------------------------------------------------------------------------------------------------|
| Transport protein                    | Albumin                                | 5.53 | 1. Transport<br>2. Systemic calcification inhibitor<br>3. Lipid binding<br>4. Metal binding<br>5. Maintaining intravascular colloid osmotic pressure (COP)<br>6. Dysopsonin                                                                      |
|                                      | Mutant hemoglobin alpha 1 globin chain | 8.72 | 1. Fe <sup>2+</sup> , Fe <sup>3+</sup> binding<br>2. Heme binding<br>3. Oxygen binding<br>4. Transport oxygen<br>5. Transport bicarbonate                                                                                                        |
|                                      | Hemoglobin alpha-1 globin chain        | 8.72 | 1. Fe <sup>2+</sup> , Fe <sup>3+</sup> binding<br>2. Heme binding<br>3. Oxygen binding<br>4. Transport oxygen<br>5. Transport bicarbonate                                                                                                        |
|                                      | Alpha-2 globin chain                   | 8.72 | 1. Fe <sup>2+</sup> , Fe <sup>3+</sup> binding<br>2. Heme binding<br>3. Oxygen binding<br>4. Transport oxygen<br>5. Transport bicarbonate                                                                                                        |
|                                      | Hemoglobin subunit alpha piens         | 8.72 | 1. Fe <sup>2+</sup> , Fe <sup>3+</sup> binding<br>2. Heme binding<br>3. Oxygen binding<br>4. Transport oxygen<br>5. Transport bicarbonate<br>6. Receptor mediated endocytosis<br>7. Regulation of cell death<br>8. Protein heterooligomerization |
|                                      | Mutant hemoglobin alpha 2 globin chain | 8.72 | 1. Fe <sup>2+</sup> , Fe <sup>3+</sup> binding<br>2. Heme binding<br>3. Oxygen binding<br>4. Transport oxygen                                                                                                                                    |
|                                      | Hemoglobin subunit alpha               | 8.72 | 1. Fe <sup>2+</sup> , Fe <sup>3+</sup> binding<br>2. Heme binding<br>3. Oxygen binding                                                                                                                                                           |

|  |                                                |      |                                                                                                                                                                                                                  |
|--|------------------------------------------------|------|------------------------------------------------------------------------------------------------------------------------------------------------------------------------------------------------------------------|
|  |                                                |      | 4. Transport oxygen                                                                                                                                                                                              |
|  | Globin C1                                      | 9.79 | 1. Metal binding (binding with Ca <sup>2+</sup> , Mg <sup>2+</sup> and Fe <sup>3+</sup> )<br>2. Heme-binding<br>3. Transport oxygen                                                                              |
|  | Beta-globin protein                            | 6.64 | 1. Heme binding<br>2. Fe <sup>2+</sup> , Fe <sup>3+</sup> binding<br>3. Oxygen binding<br>4. Transports oxygen<br>5. Makes haemoglobin (HbA) along with alpha-globin in adults                                   |
|  | Beta-globin chain                              | 5.57 | 1. Fe <sup>2+</sup> , Fe <sup>3+</sup> binding<br>2. Heme binding<br>3. Oxygen binding<br>4. Transport oxygen                                                                                                    |
|  | Truncated beta-globin                          | 7.96 | 1. Heme binding<br>2. Oxygen binding                                                                                                                                                                             |
|  | Mutant beta-globin                             | 7.92 | 1. Heme binding<br>2. Oxygen binding<br>3. Transports oxygen                                                                                                                                                     |
|  | Hemoglobin subunit beta                        | 6.25 | 1. Heme binding<br>2. Oxygen binding<br>3. Transports oxygen                                                                                                                                                     |
|  | Hemoglobin beta                                | 5.45 | 1. Fe <sup>2+</sup> , Fe <sup>3+</sup> binding<br>2. Heme binding<br>3. Oxygen binding<br>4. Transport oxygen                                                                                                    |
|  | Hemoglobin beta chain variant Hb-I_Toulouse    | 5.41 | 1. Fe <sup>2+</sup> , Fe <sup>3+</sup> binding<br>2. Heme binding<br>3. Oxygen binding<br>4. Transport oxygen                                                                                                    |
|  | Mutant hemoglobin beta chain (Fragment)        | 6.5  | 1. Fe <sup>2+</sup> , Fe <sup>3+</sup> binding<br>2. Heme binding<br>3. Oxygen binding<br>4. Transport oxygen                                                                                                    |
|  | Hemoglobin beta globin chain                   | 6.74 | 1. Fe <sup>2+</sup> , Fe <sup>3+</sup> binding<br>2. Heme binding<br>3. Oxygen binding<br>4. Transport oxygen                                                                                                    |
|  | Hemoglobin beta                                | 6.74 | 1. Fe <sup>2+</sup> , Fe <sup>3+</sup> binding<br>2. Heme binding<br>3. Oxygen binding<br>4. Transport oxygen                                                                                                    |
|  | Hemoglobin beta chain variant Hb.Sinai-Bel Air | 5.41 | 1. Fe <sup>2+</sup> , Fe <sup>3+</sup> binding<br>2. Heme binding<br>3. Oxygen binding<br>4. Transport oxygen                                                                                                    |
|  | Alpha-2-HS glycoprotein                        | 5.94 | 1. Enhance endocytosis<br>2. Ca <sup>2+</sup> binding<br>3. Post-translational protein modification<br>4. Protein metabolism                                                                                     |
|  | Transthyretin                                  | 5.6  | 1. Thyroid hormone binding<br>2. Identical protein binding<br>3. Transport iron<br>4. Transport thyroxine to the brain<br>5. Cellular protein metabolism<br>6. Neutrophil degranulation<br>7. Retinol metabolism |

|                              |                                                      |      |                                                                                                                                                                                                                                                                                                                  |
|------------------------------|------------------------------------------------------|------|------------------------------------------------------------------------------------------------------------------------------------------------------------------------------------------------------------------------------------------------------------------------------------------------------------------|
|                              | Serotransferrin                                      | 6.81 | <ol style="list-style-type: none"> <li>1. Fe<sup>3+</sup> binding</li> <li>2. Bicarbonate binding</li> <li>3. Transport iron</li> </ol>                                                                                                                                                                          |
|                              | Transferrin variant                                  | 6.68 | <ol style="list-style-type: none"> <li>1. Fe<sup>3+</sup> binding</li> <li>2. Transport Fe<sup>3+</sup> within transmembrane</li> <li>3. Involved in iron ion homeostasis in cells</li> </ol>                                                                                                                    |
|                              | Transferrin                                          | 6.97 | <ol style="list-style-type: none"> <li>1. Fe<sup>3+</sup> binding</li> <li>2. Transport Fe<sup>3+</sup> within transmembrane</li> <li>3. Involved in iron ion homeostasis in cells</li> </ol>                                                                                                                    |
|                              | Lactotransferrin                                     | 8.7  | <ol style="list-style-type: none"> <li>1. Fe<sup>3+</sup> binding</li> <li>2. Cu<sup>2+</sup> binding</li> <li>3. Bicarbonate binding</li> <li>4. Involved in serine-type endopeptidase activity</li> <li>5. Engender antimicrobial humoral response</li> <li>6. Regulates the production of cytokine</li> </ol> |
|                              | Lactoferrin                                          | 8.7  | <ol style="list-style-type: none"> <li>1. Fe<sup>2+</sup>, Fe<sup>3+</sup> binding</li> <li>2. Involved in serine-type endopeptidase activity</li> <li>3. Engender antimicrobial humoral response</li> <li>4. Regulates the production of cytokine</li> </ol>                                                    |
|                              | Delta globin                                         | 7.85 | <ol style="list-style-type: none"> <li>1. Fe<sup>2+</sup>, Fe<sup>3+</sup> binding</li> <li>2. Heme binding</li> <li>3. Oxygen binding</li> <li>4. Transport oxygen</li> <li>5. Blood coagulation</li> </ol>                                                                                                     |
|                              | Hbbm fused globin protein                            | 6.17 | <ol style="list-style-type: none"> <li>1. Fe<sup>2+</sup>, Fe<sup>3+</sup> binding</li> <li>2. Heme binding</li> <li>3. Oxygen binding</li> <li>4. Transport oxygen</li> </ol>                                                                                                                                   |
| <b>Coagulation protein</b>   | Prothrombin                                          | 5.64 | <ol style="list-style-type: none"> <li>1. Non-covalently calcium ions (Ca<sup>2+</sup>) binding.</li> <li>2. Blood coagulation</li> <li>3. Involved in serine-type endopeptidase activity</li> </ol>                                                                                                             |
| <b>Cell adhesive protein</b> | cDNA FLJ54111                                        | 6.95 | <ol style="list-style-type: none"> <li>1. Ca<sup>2+</sup> binding</li> <li>2. Collagen binding</li> </ol>                                                                                                                                                                                                        |
|                              | Proliferation-inducing protein 33                    | 4.71 | <ol style="list-style-type: none"> <li>1. Ca<sup>2+</sup> binding</li> <li>2. Collagen binding</li> </ol>                                                                                                                                                                                                        |
|                              | C-type lectin domain family 3 member B isoform CRA_a | 5.21 | <ol style="list-style-type: none"> <li>1. Carbohydrate binding</li> <li>2. Ossification</li> </ol>                                                                                                                                                                                                               |
| <b>Enzymes</b>               | N-acetyltransferase 5                                | 5.84 | <ol style="list-style-type: none"> <li>1. Involved in transferase activity</li> <li>2. Catalyzes the transfer of acetyl groups from acetyl CoA to arylamines</li> </ol>                                                                                                                                          |
| <b>Structural protein</b>    | cDNA FLJ56708                                        | 8.44 | <ol style="list-style-type: none"> <li>1. Involved in structural molecular activity</li> </ol>                                                                                                                                                                                                                   |
|                              | Keratin, type I cytoskeletal 10                      | 5.13 | <ol style="list-style-type: none"> <li>1. Cross linking of peptides</li> <li>2. Protein heterodimerization and heterotetramerization activity</li> <li>3. Keratinization</li> </ol>                                                                                                                              |
|                              | Keratin, type I cytoskeletal 28                      | 5.33 | <ol style="list-style-type: none"> <li>1. Involved in structural molecular activity</li> <li>2. Cornification</li> <li>3. keratinization</li> </ol>                                                                                                                                                              |
|                              | Keratin 1                                            | 8.15 | <ol style="list-style-type: none"> <li>1. Involved in structural molecular activity</li> </ol>                                                                                                                                                                                                                   |
|                              | Keratin, type II cytoskeletal 2                      | 8.07 | <ol style="list-style-type: none"> <li>1. Cytoskeletal protein binding</li> <li>2. Cross linking of peptides</li> <li>3. Structural constituent of cytoskeleton</li> <li>4. Keratinization</li> </ol>                                                                                                            |



|               |                                              |                                                                                            |                                                                                                                                                                                                                                                                                      |
|---------------|----------------------------------------------|--------------------------------------------------------------------------------------------|--------------------------------------------------------------------------------------------------------------------------------------------------------------------------------------------------------------------------------------------------------------------------------------|
| Others        | Protein unc-13 homolog B                     | 5.67                                                                                       | <ol style="list-style-type: none"> <li>1. Ca<sup>2+</sup>binding</li> <li>2. Calmodulin binding</li> <li>3. Phospholipid binding</li> <li>4. Diacylglycerol binding</li> <li>5. Intracellular signal transduction</li> <li>6. Presynaptic and synaptic vesicle Exocytosis</li> </ol> |
|               | MHC class I antigen                          | 6.64                                                                                       | <ol style="list-style-type: none"> <li>1. Peptide binding engendered by cytosolic protein degradation via the proteasome</li> <li>2. Exhibit intracellular proteins to cytotoxic T cells</li> <li>3. Function as an inhibitory ligand for natural killer cells</li> </ol>            |
|               | Alpha-fetoprotein                            | 4.57                                                                                       | <ol style="list-style-type: none"> <li>1. Metal (copper, nickel) binding</li> <li>2. Fatty acids binding</li> <li>3. Bilirubin binding</li> <li>4. Cellular protein metabolism</li> <li>5. Progesterone metabolism</li> </ol>                                                        |
|               | cDNA FLJ57154                                | 6.29                                                                                       | <ol style="list-style-type: none"> <li>1. Helps in heterologous expression</li> </ol>                                                                                                                                                                                                |
|               | cDNA FLJ79229                                | 8.10                                                                                       | <ol style="list-style-type: none"> <li>1. Fe<sup>2+</sup>, Fe<sup>3+</sup> binding</li> <li>2. Controls cytokine production</li> <li>3. Involved in antimicrobial humoral response</li> </ol>                                                                                        |
|               | Uncharacterized protein                      | 6.28                                                                                       | <ol style="list-style-type: none"> <li>1. Fe<sup>2+</sup>, Fe<sup>3+</sup> binding</li> <li>2. Heme binding</li> <li>3. Oxygen binding</li> <li>4. Transport oxygen</li> </ol>                                                                                                       |
|               | A-kinase anchor protein                      | 8.84                                                                                       | <ol style="list-style-type: none"> <li>1. Protein kinase A (PKA) binding</li> <li>2. Specific substrate targeting by means of phosphorylation (through PKA) and dephosphorylation (through phosphatases)</li> </ol>                                                                  |
|               | Zinc finger SWIM domain-containing protein 4 | 6.47                                                                                       | <ol style="list-style-type: none"> <li>1. Zn<sup>2+</sup> binding</li> <li>2. DNA binding</li> </ol>                                                                                                                                                                                 |
|               | Capsid scaffolding protein                   | 8.10                                                                                       | <ol style="list-style-type: none"> <li>1. Identical protein binding</li> <li>2. Involved in nuclear capsid macromolecular assembly</li> <li>3. Involved in serine-type endopeptidase activity</li> </ol>                                                                             |
|               | cDNA FLJ51509                                | 7.42                                                                                       | <ol style="list-style-type: none"> <li>1. Behaves similar to Alpha-fetoprotein, i.e- takes part in metal, fatty acids and bilirubin binding, involved in cellular protein and progesterone metabolism</li> </ol>                                                                     |
| cDNA FLJ55606 | 5.84                                         | <ol style="list-style-type: none"> <li>1. Cysteine-type endopeptidase inhibitor</li> </ol> |                                                                                                                                                                                                                                                                                      |

**Table S7.** List of identified proteins with high Fe/Mg-CA in 10% FBS along with their isoelectric point (pI) and major biological functions.

| Functional classification of protein | Identified Protein | pI   | Detailed Function                                                                                                                                                                                                                    |
|--------------------------------------|--------------------|------|--------------------------------------------------------------------------------------------------------------------------------------------------------------------------------------------------------------------------------------|
| Transport protein                    | Albumin            | 5.53 | <ol style="list-style-type: none"> <li>1. Transport</li> <li>2. Systemic calcification inhibitor</li> <li>3. Lipid binding</li> <li>4. Metal binding</li> <li>5. Maintaining intravascular colloid osmotic pressure (COP)</li> </ol> |

|  |                                        |      |                                                                                                                                                                                                                                                                                                         |
|--|----------------------------------------|------|---------------------------------------------------------------------------------------------------------------------------------------------------------------------------------------------------------------------------------------------------------------------------------------------------------|
|  | Globin C1                              | 9.79 | <ol style="list-style-type: none"> <li>1. Metal binding (binding with <math>\text{Ca}^{2+}</math>, <math>\text{Mg}^{2+}</math> and <math>\text{Fe}^{3+}</math>).</li> <li>2. Heme-binding</li> <li>3. Transport oxygen.</li> </ol>                                                                      |
|  | Alpha-2 globin chain                   | 8.72 | <ol style="list-style-type: none"> <li>1. <math>\text{Fe}^{2+}</math>, <math>\text{Fe}^{3+}</math> binding</li> <li>2. Heme binding</li> <li>3. Oxygen binding</li> <li>4. Transport oxygen</li> <li>5. Transport bicarbonate</li> </ol>                                                                |
|  | Hemoglobin subunit alpha               | 8.72 | <ol style="list-style-type: none"> <li>1. <math>\text{Fe}^{2+}</math>, <math>\text{Fe}^{3+}</math> binding</li> <li>2. Heme binding</li> <li>3. Oxygen binding</li> <li>4. Transport oxygen</li> </ol>                                                                                                  |
|  | Mutant hemoglobin alpha 1 globin chain | 8.72 | <ol style="list-style-type: none"> <li>1. <math>\text{Fe}^{2+}</math>, <math>\text{Fe}^{3+}</math> binding</li> <li>2. Heme binding</li> <li>3. Oxygen binding</li> <li>4. Transport oxygen</li> <li>5. Transport bicarbonate</li> </ol>                                                                |
|  | Hemoglobin alpha-1 globin chain        | 8.72 | <ol style="list-style-type: none"> <li>1. <math>\text{Fe}^{2+}</math>, <math>\text{Fe}^{3+}</math> binding</li> <li>2. Heme binding</li> <li>3. Oxygen binding</li> <li>4. Transport oxygen</li> <li>5. Transport bicarbonate</li> </ol>                                                                |
|  | Mutant hemoglobin alpha 2 globin chain | 8.72 | <ol style="list-style-type: none"> <li>1. <math>\text{Fe}^{2+}</math>, <math>\text{Fe}^{3+}</math> binding</li> <li>2. Heme binding</li> <li>3. Oxygen binding</li> <li>4. Transport oxygen</li> </ol>                                                                                                  |
|  | Beta-globin protein                    | 6.64 | <ol style="list-style-type: none"> <li>1. Heme binding</li> <li>2. Makes haemoglobin (HbA) along with alpha-globin in adults</li> </ol>                                                                                                                                                                 |
|  | Alpha-2-HS glycoprotein                | 5.94 | <ol style="list-style-type: none"> <li>1. Enhance endocytosis</li> <li>2. <math>\text{Ca}^{2+}</math> binding</li> <li>3. Post-translational protein modification</li> <li>4. Protein metabolism</li> </ol>                                                                                             |
|  | Transthyretin                          | 5.6  | <ol style="list-style-type: none"> <li>1. Thyroid hormone binding</li> <li>2. Identical protein binding</li> <li>3. Transport iron</li> <li>4. Transports thyroxine to the brain</li> <li>5. Cellular protein metabolism</li> <li>6. Neutrophil degranulation</li> <li>7. Retinol metabolism</li> </ol> |
|  | Serotransferrin                        | 6.81 | <ol style="list-style-type: none"> <li>1. <math>\text{Fe}^{3+}</math> binding</li> <li>2. Bicarbonate binding</li> <li>3. Transport iron</li> </ol>                                                                                                                                                     |
|  | Transferrin variant                    | 6.68 | <ol style="list-style-type: none"> <li>1. <math>\text{Fe}^{3+}</math> binding</li> <li>2. Transport <math>\text{Fe}^{3+}</math> within transmembrane</li> <li>3. Involved in iron ion homeostasis in cells</li> </ol>                                                                                   |
|  | Transferrin                            | 6.97 | <ol style="list-style-type: none"> <li>1. <math>\text{Fe}^{3+}</math> binding</li> <li>2. Transport <math>\text{Fe}^{3+}</math> within transmembrane</li> <li>3. Involved in iron ion homeostasis in cells</li> </ol>                                                                                   |
|  | Tetranectin                            | 5.8  | <ol style="list-style-type: none"> <li>1. <math>\text{Ca}^{2+}</math> binding</li> <li>2. Heparin binding</li> <li>3. Carbohydrate binding</li> <li>4. Cellular metabolism</li> <li>5. Bone mineralization</li> <li>6. Ossification</li> <li>7. Platelet degranulation</li> </ol>                       |
|  | cDNA FLJ54839                          | 7.42 | 1. Behaves similar to Lactotransferrin precursor                                                                                                                                                                                                                                                        |
|  | cDNA FLJ53691                          | 6.81 | 1. $\text{Fe}^{3+}$ binding                                                                                                                                                                                                                                                                             |

|                              |                                                      |      |                                                                                                                                                                                                                                    |
|------------------------------|------------------------------------------------------|------|------------------------------------------------------------------------------------------------------------------------------------------------------------------------------------------------------------------------------------|
|                              |                                                      |      | 2. Transport Fe <sup>3+</sup> within transmembrane                                                                                                                                                                                 |
|                              | Lactotransferrin                                     | 8.7  | 1. Fe <sup>3+</sup> binding<br>2. Cu <sup>2+</sup> binding<br>3. Bicarbonate binding<br>4. Involved in serine type endopeptidase activity<br>5. Engender antimicrobial humoral response<br>6. Regulates the production of cytokine |
|                              | Lactoferrin                                          | 8.7  | 1. Fe <sup>2+</sup> , Fe <sup>3+</sup> binding<br>2. Involved in serine type endopeptidase activity<br>3. Engender antimicrobial humoral response<br>4. Regulates the production of cytokine                                       |
|                              | Delta globin                                         | 7.85 | 1. Fe <sup>2+</sup> , Fe <sup>3+</sup> binding<br>2. Heme binding<br>3. Oxygen binding<br>4. Transport oxygen<br>5. Blood coagulation                                                                                              |
|                              | Hemoglobin subunit gamma-2                           | 6.64 | 1. Fe <sup>2+</sup> , Fe <sup>3+</sup> binding<br>2. Heme binding<br>3. Oxygen binding<br>4. Transport oxygen<br>5. Blood coagulation                                                                                              |
|                              | Globin B3                                            | 8.67 | 1. Fe <sup>2+</sup> , Fe <sup>3+</sup> binding<br>2. Heme binding<br>3. Hemoglobin alpha binding<br>4. Oxygen binding<br>5. Transport oxygen                                                                                       |
|                              | Gamma-G globin                                       | 7.2  | 1. Fe <sup>2+</sup> , Fe <sup>3+</sup> binding<br>2. Heme binding<br>3. Oxygen binding<br>4. Transport oxygen                                                                                                                      |
|                              | Hbbm fused globin protein                            | 6.17 | 1. Fe <sup>2+</sup> , Fe <sup>3+</sup> binding<br>2. Heme binding<br>3. Oxygen binding<br>4. Transport oxygen                                                                                                                      |
| <b>Cell adhesive protein</b> | SPARC-like protein 1                                 | 4.73 | 1. Ca <sup>2+</sup> binding<br>2. Collagen binding<br>3. Extracellular matrix binding<br>4. Adhesion of synaptic membrane<br>5. Cellular protein metabolism                                                                        |
|                              | Proliferation-inducing protein 33                    | 4.71 | 1. Ca <sup>2+</sup> binding<br>2. Collagen binding                                                                                                                                                                                 |
|                              | C-type lectin domain family 3 member B isoform CRA_a | 5.21 | 1. Carbohydrate binding<br>2. Ossification                                                                                                                                                                                         |
|                              | cDNA FLJ54111                                        | 6.95 | 1. Ca <sup>2+</sup> binding<br>2. Collagen binding                                                                                                                                                                                 |
|                              | cDNA FLJ54278                                        | 4.83 | 1. Ca <sup>2+</sup> binding<br>2. Collagen binding                                                                                                                                                                                 |
|                              | cDNA FLJ54387                                        | 4.71 | 1. Ca <sup>2+</sup> binding<br>2. Collagen binding                                                                                                                                                                                 |
|                              | cDNA FLJ55140                                        | 4.73 | 1. Ca <sup>2+</sup> binding<br>2. Collagen binding                                                                                                                                                                                 |

|                            |                                              |      |                                                                                                                                                                                                        |
|----------------------------|----------------------------------------------|------|--------------------------------------------------------------------------------------------------------------------------------------------------------------------------------------------------------|
| <b>Coagulation protein</b> | Prothrombin                                  | 5.64 | 1. Non-covalently calcium ions (Ca <sup>2+</sup> ) binding.<br>2. Blood coagulation<br>3. Involved in serine-type endopeptidase activity                                                               |
| <b>Structural protein</b>  | Keratin, type II cytoskeletal 2 epidermal    | 8.07 | 1. Cytoskeletal protein binding<br>2. Cross linking of peptides<br>3. Structural constituent of cytoskeleton<br>4. Keratinization                                                                      |
|                            | Keratin, type II cytoskeletal 5              | 7.58 | 1. Scaffold protein binding<br>2. Structural constituent of cytoskeleton<br>3. Keratinization                                                                                                          |
|                            | Keratin, type I cytoskeletal 14              | 5.09 | 1. Responding to Zn <sup>2+</sup><br>2. Keratin filament binding<br>3. Structural constituent of cytoskeleton<br>4. Keratinization                                                                     |
|                            | Keratin 77                                   | 5.8  | 1. Involved in structural integrity of epithelial cells<br>2. Involved in structural molecular activity                                                                                                |
|                            | Keratin 1                                    | 8.15 | 1. Significant for structural integrity of a complex or its assembly within or outside a cell.                                                                                                         |
|                            | Keratin, type I cytoskeletal 9               | 5.14 | 1. Keratin filament binding<br>2. Structural constituent of cytoskeleton<br>3. Keratinization<br>4. Epidermis development<br>5. Intermediate filament organization                                     |
|                            | Keratin, type I cytoskeletal 10              | 5.13 | 1. Cross linking of peptides<br>2. Protein heterodimerization and heterotetramerization activity<br>3. Structural constituent of epidermis<br>4. Keratinization                                        |
| <b>Others</b>              | cDNA FLJ57154                                | 6.29 | 1. Helps in heterologous expression                                                                                                                                                                    |
|                            | cDNA FLJ58606                                | 7.82 | 1. Helps in heterologous expression                                                                                                                                                                    |
|                            | Protein S100-A7A                             | 6.89 | 1. Ca <sup>2+</sup> binding<br>2. Transition metal binding<br>3. Involved in protein self-association                                                                                                  |
|                            | A-kinase anchor protein                      | 8.84 | 1. Protein kinase A (PKA) binding<br>2. Specific substrate targeting by means of phosphorylation (through PKA) and dephosphorylation (through phosphatases)                                            |
|                            | Epididymis luminal protein 110               | 7.8  | 1. Fe <sup>2+</sup> , Fe <sup>3+</sup> binding<br>2. Involved in serine type endopeptidase action<br>3. Engender antimicrobial humoral response<br>4. Regulates the production of cytokine             |
|                            | Zinc finger SWIM domain-containing protein 4 | 6.47 | 1. Zn <sup>2+</sup> binding<br>2. DNA binding                                                                                                                                                          |
|                            | Alpha-fetoprotein                            | 4.57 | 1. Metal (copper, nickel) binding<br>2. Fatty acids binding<br>3. Bilirubin binding<br>4. Cellular protein metabolism<br>5. Progesterone metabolism                                                    |
|                            | Protein unc-13 homolog B                     | 5.67 | 1. Ca <sup>2+</sup> binding<br>2. Calmodulin binding<br>3. Phospholipid binding<br>4. Diacylglycerol binding<br>5. Intracellular signal transduction<br>6. Presynaptic and synaptic vesicle exocytosis |

**Table S8:** Protein corona profile of CA in 10% FBS in terms of their molecular weight (Da), -10lgP and coverage (%).

| Functional classification of protein | Identified Protein                                       | Molecular Weight (Da) | -10lgP | Coverage (%) |
|--------------------------------------|----------------------------------------------------------|-----------------------|--------|--------------|
| <b>Transport Protein</b>             | ALB protein                                              | 69294                 | 260.46 | 80           |
|                                      | Serum Albumin                                            | 69227                 | 207.46 | 40           |
|                                      | Alpha-2-HS glycoprotein                                  | 39325                 | 121.73 | 11           |
|                                      | cDNA FLJ51509                                            | 54207                 | 107.1  | 15           |
|                                      | Transthyretin                                            | 15872                 | 80.92  | 28           |
|                                      | Serotransferrin                                          | 77064                 | 92.84  | 7            |
|                                      | Transferrin variant                                      | 77080                 | 92.84  | 7            |
|                                      | Transferrin                                              | 76960                 | 92.84  | 7            |
|                                      | LMAN1 protein                                            | 57549                 | 21.54  | 1            |
|                                      | Globin C1                                                | 19232                 | 78.40  | 23           |
|                                      | Globin B1                                                | 16071                 | 33.31  | 7            |
|                                      | Globin A1                                                | 15954                 | 33.31  | 7            |
|                                      | Alpha-1-acid glycoprotein (positive acute phase protein) | 23512                 | 37.40  | 6            |
|                                      | Mutant hemoglobin alpha 1 globin chain                   | 10753                 | 78.40  | 40           |
|                                      | Hemoglobin alpha-1 globin chain                          | 10783                 | 78.40  | 40           |
|                                      | Hemoglobin subunit alpha                                 | 20146                 | 78.40  | 28           |
|                                      | Alpha-2 globin chain                                     | 15258                 | 78.40  | 28           |
|                                      | Mutant hemoglobin alpha 2 globin chain                   | 15258                 | 78.40  | 28           |
|                                      | Lactoferrin                                              | 78357                 | 69.91  | 4            |
|                                      | Beta-globin protein                                      | 4550                  | 59.21  | 56           |
|                                      | Hemoglobin fetal subunit beta                            | 15859                 | 33.31  | 7            |
|                                      | Truncated beta-globin                                    | 6998                  | 59.21  | 37           |
|                                      | Mutant beta-globin                                       | 9689                  | 59.21  | 26           |
|                                      | Beta-globin chain                                        | 11476                 | 59.21  | 26           |
|                                      | Hemoglobin subunit beta                                  | 9670                  | 59.21  | 26           |
|                                      | Hemoglobin beta chain                                    | 11023                 | 59.21  | 23           |



|                              |                                                        |        |        |    |
|------------------------------|--------------------------------------------------------|--------|--------|----|
|                              | Hemoglobin beta chain variant Hb.Sinai-Bel Air         | 11548  | 59.21  | 22 |
|                              | Hemoglobin beta chain variant Hb-I_Toulouse            | 11505  | 59.21  | 22 |
|                              | Vitamin D-binding protein                              | 53021  | 47.50  | 1  |
| <b>Cell adhesive protein</b> | cDNA FLJ54111                                          | 63437  | 92.84  | 8  |
| <b>Coagulation protein</b>   | Prothrombin                                            | 35932  | 39.89  | 3  |
| <b>Metabolic Protein</b>     | Adiponectin                                            | 26133  | 39.64  | 4  |
| <b>Protease inhibitor</b>    | Kininogen-1                                            | 71957  | 43.16  | 2  |
|                              | KNG1 protein                                           | 33055  | 43.16  | 3  |
|                              | Fetuin-B                                               | 42663  | 49.43  | 11 |
|                              | Alpha-1-antiproteinase                                 | 46104  | 118.31 | 18 |
| <b>Structural Protein</b>    | Keratin, type I cytoskeletal 10                        | 54848  | 86.65  | 14 |
|                              | Keratin 1                                              | 66126  | 101.91 | 11 |
|                              | KRT6A protein                                          | 60045  | 62.63  | 4  |
|                              | Keratin, type I cytoskeletal 14                        | 51561  | 72.04  | 8  |
|                              | Histone H2B                                            | 13926  | 20.26  | 7  |
| <b>Regulatory Protein</b>    | Junction mediating and regulatory protein p53 cofactor | 109383 | 21.54  | 1  |
| <b>Others</b>                | Uncharacterized protein                                | 18931  | 59.21  | 13 |
|                              | Epididymis secretory protein Li 51                     | 52964  | 47.50  | 1  |
|                              | Alpha-fetoprotein                                      | 68678  | 107.1  | 12 |
|                              | cDNA FLJ95666                                          | 69393  | 206.8  | 39 |
|                              | cDNA FLJ57154                                          | 50756  | 107.10 | 16 |
|                              | cDNA FLJ55606                                          | 46627  | 121.73 | 9  |

**Table S9: Protein corona profile of low Fe/Mg-CA in 10% FBS in terms of their molecular weight (Da), -10lgP and coverage (%).**

| Functional classification of protein | Identified Protein                                   | Molecular Weight (Da) | -10lgP | Coverage (%) |
|--------------------------------------|------------------------------------------------------|-----------------------|--------|--------------|
| <b>Transport protein</b>             | Albumin                                              | 66531                 | 180.69 | 36           |
|                                      | Mutant hemoglobin alpha 1 globin chain               | 10753                 | 95.34  | 47           |
|                                      | Hemoglobin alpha-1 globin chain                      | 10783                 | 95.34  | 47           |
|                                      | Alpha-2 globin chain                                 | 15258                 | 95.34  | 33           |
|                                      | Hemoglobin subunit alpha piens                       | 15258                 | 95.34  | 33           |
|                                      | Mutant hemoglobin alpha 2 globin chain               | 15258                 | 95.34  | 33           |
|                                      | Hemoglobin subunit alpha                             | 20146                 | 95.34  | 33           |
|                                      | Globin C1                                            | 19232                 | 95.34  | 27           |
|                                      | Beta-globin protein                                  | 4550                  | 57.88  | 56           |
|                                      | Beta-globin chain                                    | 11476                 | 62.94  | 22           |
|                                      | Truncated beta-globin                                | 6998                  | 57.88  | 37           |
|                                      | Mutant beta-globin                                   | 9689                  | 62.94  | 26           |
|                                      | Hemoglobin subunit beta                              | 9670                  | 57.88  | 26           |
|                                      | Hemoglobin beta chain                                | 11023                 | 57.88  | 23           |
|                                      | Hemoglobin beta chain variant Hb-I_Toulouse          | 11505                 | 62.94  | 22           |
|                                      | Mutant hemoglobin beta chain (Fragment)              | 11501                 | 57.88  | 22           |
|                                      | Hemoglobin beta globin chain                         | 11494                 | 57.88  | 22           |
|                                      | Hemoglobin beta                                      | 11482                 | 62.94  | 22           |
|                                      | Hemoglobin beta chain variant Hb.Sinai-Bel Air       | 11548                 | 57.88  | 22           |
|                                      | Alpha-2-HS glycoprotein                              | 39325                 | 62.15  | 13           |
|                                      | Transthyretin                                        | 15872                 | 88.27  | 44           |
|                                      | Serotransferrin                                      | 77064                 | 77.82  | 5            |
|                                      | Transferrin variant                                  | 77080                 | 77.82  | 5            |
|                                      | Transferrin                                          | 76960                 | 77.82  | 5            |
|                                      | Lactotransferrin                                     | 76626                 | 55.45  | 3            |
|                                      | Lactoferrin                                          | 77981                 | 55.45  | 3            |
|                                      | Delta globin                                         | 16055                 | 48.92  | 7            |
|                                      | Hbbm fused globin protein                            | 10928                 | 40.72  | 10           |
| <b>Coagulation protein</b>           | Prothrombin                                          | 35932                 | 37.17  | 3            |
| <b>Cell adhesive protein</b>         | cDNA FLJ54111                                        | 63437                 | 71.87  | 6            |
|                                      | Proliferation-inducing protein 33                    | 75230                 | 72.24  | 5            |
|                                      | C-type lectin domain family 3 member B isoform CRA_a | 22537                 | 48.09  | 10           |
| <b>Enzymes</b>                       | N-acetyltransferase 5                                | 18857                 | 24.33  | 4            |
| <b>Structural protein</b>            | cDNA FLJ56708                                        | 18049                 | 62.03  | 15           |
|                                      | Keratin, type I cytoskeletal 10                      | 58827                 | 154.11 | 34           |
|                                      | Keratin, type I cytoskeletal 28                      | 50567                 | 59.40  | 5            |

|               |                                              |        |        |    |
|---------------|----------------------------------------------|--------|--------|----|
|               | Keratin 1                                    | 66126  | 145.46 | 22 |
|               | Keratin, type II cytoskeletal 2              | 65433  | 103.32 | 13 |
| <b>Others</b> | Protein unc-13 homolog B                     | 180679 | 21.64  | 1  |
|               | MHC class I antigen                          | 12392  | 23.42  | 4  |
|               | Alpha-fetoprotein                            | 68678  | 70.56  | 6  |
|               | cDNA FLJ57154                                | 50756  | 54.72  | 7  |
|               | cDNA FLJ79229                                | 73170  | 68.49  | 3  |
|               | Uncharacterized protein                      | 18931  | 57.88  | 13 |
|               | A-kinase anchor protein                      | 161184 | 21.18  | 1  |
|               | Zinc finger SWIM domain-containing protein 4 | 99649  | 29.84  | 1  |
|               | Capsid scaffolding protein                   | 66941  | 21.94  | 1  |
|               | cDNA FLJ51509                                | 54207  | 70.56  | 8  |
|               | cDNA FLJ55606                                | 46627  | 62.15  | 11 |

**Table S10:** Protein corona profile of high Fe/Mg-CA in 10% FBS in terms of their molecular weight (Da), -10lgP and coverage (%).

| Functional classification of protein | Identified Protein                     | Molecular Weight (Da) | -10lgP | Coverage (%) |
|--------------------------------------|----------------------------------------|-----------------------|--------|--------------|
| <b>Transport protein</b>             | Albumin                                | 66531                 | 158.89 | 27           |
|                                      | Globin C1                              | 19232                 | 90.79  | 23           |
|                                      | Alpha-2 globin chain                   | 15258                 | 86.99  | 28           |
|                                      | Hemoglobin subunit alpha               | 20146                 | 86.99  | 28           |
|                                      | Mutant hemoglobin alpha 1 globin chain | 10753                 | 86.99  | 40           |
|                                      | Hemoglobin alpha-1 globin chain        | 10783                 | 86.99  | 40           |
|                                      | Mutant hemoglobin alpha 2 globin chain | 15258                 | 86.99  | 28           |
|                                      | Beta-globin protein                    | 2104                  | 40.72  | 59           |
|                                      | Alpha-2-HS glycoprotein                | 39325                 | 55.71  | 9            |
|                                      | Transthyretin                          | 15872                 | 47.21  | 24           |
|                                      | Serotransferrin                        | 77064                 | 71.87  | 5            |
|                                      | Transferrin variant                    | 77080                 | 71.87  | 5            |
|                                      | Transferrin                            | 76960                 | 71.87  | 5            |
|                                      | Tetranectin                            | 17794                 | 48.09  | 13           |
|                                      | cDNA FLJ54839                          | 54207                 | 55.45  | 7            |
|                                      | cDNA FLJ53691                          | 74832                 | 71.87  | 5            |
|                                      | Lactotransferrin                       | 76626                 | 55.45  | 3            |
|                                      | Lactoferrin                            | 77981                 | 55.45  | 3            |
|                                      | Delta globin                           | 16055                 | 48.92  | 7            |
|                                      | Hemoglobin subunit gamma-2             | 15319                 | 40.72  | 7            |
|                                      | Globin B3                              | 16203                 | 40.72  | 7            |

|                              |                                                      |        |        |    |
|------------------------------|------------------------------------------------------|--------|--------|----|
|                              | Gamma-G globin                                       | 16969  | 40.72  | 6  |
|                              | Hbbm fused globin protein                            | 10928  | 40.72  | 10 |
| <b>Cell adhesive protein</b> | SPARC-like protein 1                                 | 75208  | 72.24  | 5  |
|                              | Proliferation-inducing protein 33                    | 75230  | 72.24  | 5  |
|                              | C-type lectin domain family 3 member B isoform CRA_a | 22537  | 48.09  | 10 |
|                              | cDNA FLJ54111                                        | 63437  | 71.87  | 6  |
|                              | cDNA FLJ54278                                        | 58507  | 72.24  | 7  |
|                              | cDNA FLJ54387                                        | 64141  | 72.24  | 6  |
|                              | cDNA FLJ55140                                        | 55519  | 72.24  | 7  |
| <b>Coagulation protein</b>   | Prothrombin                                          | 35932  | 35.09  | 3  |
| <b>Structural protein</b>    | Keratin, type II cytoskeletal 2 epidermal            | 65433  | 131.06 | 13 |
|                              | Keratin, type II cytoskeletal 5                      | 62378  | 97.24  | 11 |
|                              | Keratin, type I cytoskeletal 14                      | 51562  | 95.71  | 13 |
|                              | Keratin 77                                           | 61802  | 81.98  | 5  |
|                              | Keratin 1                                            | 66126  | 232.15 | 40 |
|                              | Keratin, type I cytoskeletal 9                       | 62064  | 183.04 | 33 |
|                              | Keratin, type I cytoskeletal 10                      | 58827  | 172.78 | 37 |
| <b>Others</b>                | cDNA FLJ57154                                        | 50756  | 54.72  | 7  |
|                              | cDNA FLJ58606                                        | 91670  | 29.84  | 1  |
|                              | Protein S100-A7A                                     | 11305  | 36.53  | 11 |
|                              | A-kinase anchor protein                              | 161184 | 21.18  | 1  |
|                              | Epididymis luminal protein 110                       | 78182  | 55.45  | 3  |
|                              | Zinc finger SWIM domain-containing protein 4         | 99649  | 29.84  | 1  |
|                              | Alpha-fetoprotein                                    | 68678  | 54.72  | 5  |
|                              | Protein unc-13 homolog B                             | 180679 | 21.64  | 1  |
